# Supplementary material for: Mosquito-Disseminated Pyriproxyfen Yields High Breeding-Site Coverage and Boosts Juvenile Mosquito Mortality at the Neighborhood Scale
Source: PubMed Central journal article supplement (PMC4388722; doi:10.1371/journal.pntd.0003702), 2015-04-07
Supplement: pntd.0003702.s003.pdf [file pntd.0003702.s003.pdf]

**Table S1.** Mosquito-disseminated pyriproxyfen in sentinel breeding sites with and without *Aedes aegypti*, *Ae. albopictus*, and *Culex* spp. larvae during the intervention

| Species                      | Contamination* |    |       | OR†  | 95% CI |       | P-value‡ |
|------------------------------|----------------|----|-------|------|--------|-------|----------|
|                              | Yes            | No | %     |      | Lower  | Upper |          |
| <i>Aedes aegypti</i>         |                |    |       |      |        |       |          |
| Yes                          | 278            | 27 | 91.15 | 4.29 | 2.47   | 7.54  | <0.0001  |
| No                           | 86             | 36 | 70.49 | 1    |        |       |          |
| <i>Aedes aegypti</i> only    |                |    |       |      |        |       |          |
| Yes                          | 196            | 16 | 92.45 | 3.42 | 1.89   | 6.41  | <0.0001  |
| No                           | 168            | 47 | 78.14 | 1    |        |       |          |
| <i>Aedes albopictus</i>      |                |    |       |      |        |       |          |
| Yes                          | 149            | 39 | 79.26 | 0.43 | 0.24   | 0.74  | 0.0016   |
| No                           | 215            | 24 | 89.96 | 1    |        |       |          |
| <i>Aedes albopictus</i> only |                |    |       |      |        |       |          |
| Yes                          | 71             | 28 | 71.72 | 0.30 | 0.17   | 0.54  | <0.0001  |
| No                           | 293            | 35 | 89.33 | 1    |        |       |          |
| <i>Culex</i> spp.            |                |    |       |      |        |       |          |
| Yes                          | 22             | 9  | 70.97 | 0.39 | 0.17   | 0.93  | 0.026    |
| No                           | 342            | 54 | 86.36 | 1    |        |       |          |
| <i>Culex</i> spp. only       |                |    |       |      |        |       |          |
| Yes                          | 15             | 7  | 68.18 | 0.35 | 0.14   | 0.94  | 0.03     |
| No                           | 349            | 56 | 86.17 | 1    |        |       |          |

\*Only sentinel breeding sites that had at least one larva during the intervention period.

†Conditional maximum-likelihood odds ratio.

‡Fisher's exact test, one-tailed.
