# Supplementary material for: Mosquito-Disseminated Pyriproxyfen Yields High Breeding-Site Coverage and Boosts Juvenile Mosquito Mortality at the Neighborhood Scale
Source: PubMed Central journal article supplement (PMC4388722; doi:10.1371/journal.pntd.0003702), 2015-04-07
Supplement: pntd.0003702.s004.pdf [file pntd.0003702.s004.pdf]

**Table S2.** Differences in mean *Aedes aegypti* mortality among trial periods and Tukey ‘honestly significant difference’ (HSD) test

| Period (A)  | Period (B)  | Difference (A–B) | SE    | 95% CI |       | HSD <i>P</i> -value |
|-------------|-------------|------------------|-------|--------|-------|---------------------|
| During      | Before      | 0.795            | 0.015 | 0.756  | 0.835 | <0.0001             |
| During      | Early after | 0.656            | 0.020 | 0.605  | 0.707 | <0.0001             |
| During      | Late after  | 0.828            | 0.019 | 0.780  | 0.877 | <0.0001             |
| Early after | Before      | 0.139            | 0.017 | 0.095  | 0.184 | <0.0001             |
| Early after | Late after  | 0.172            | 0.021 | 0.119  | 0.225 | <0.0001             |
| Before      | Late after  | 0.033            | 0.017 | –0.009 | 0.076 | 0.1889              |
