# Supplementary material for: Mosquito-Disseminated Pyriproxyfen Yields High Breeding-Site Coverage and Boosts Juvenile Mosquito Mortality at the Neighborhood Scale
Source: PubMed Central journal article supplement (PMC4388722; doi:10.1371/journal.pntd.0003702), 2015-04-07
Supplement: pntd.0003702.s005.pdf [file pntd.0003702.s005.pdf]

**Table S3.** Differences in mean mosquito mortality (all species pooled) among trial periods and Tukey ‘honestly significant difference’ (HSD) test

| Period (A)  | Period (B)  | Difference (A–B) | SE    | 95% CI |       | HSD <i>P</i> -value |
|-------------|-------------|------------------|-------|--------|-------|---------------------|
| During      | Before      | 0.709            | 0.013 | 0.676  | 0.742 | <0.0001             |
| During      | Early after | 0.592            | 0.016 | 0.551  | 0.633 | <0.0001             |
| During      | Late after  | 0.744            | 0.016 | 0.703  | 0.785 | <0.0001             |
| Early after | Before      | 0.117            | 0.013 | 0.082  | 0.151 | <0.0001             |
| Early after | Late after  | 0.152            | 0.016 | 0.109  | 0.194 | <0.0001             |
| Before      | Late after  | 0.035            | 0.013 | 0.001  | 0.070 | 0.0434              |
